# Supplementary material
Source: PubMed Central journal article supplement (PMC4956537)
Supplement: NIHMS788926-supplement-3.pdf [file NIHMS788926-supplement-3.pdf]

## Supplemental Data

**Figure S1. Workflow for mutation filtering**

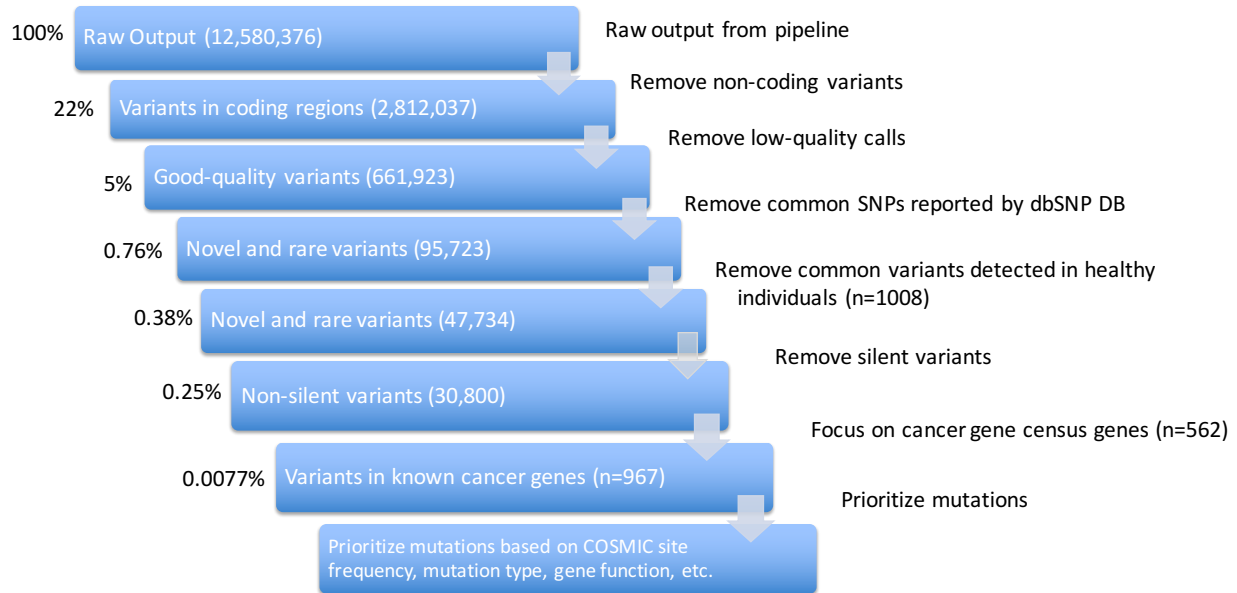

See attached excel files:

**Table S1: Patient information.xlsx**

**Table S2: Complete WES data.xlsx**

**Table S3: Characteristics of adult patients with MPAL and comparison between *DNMT3A* mutated and wild-type patients.**

| Patients (n = 18)<br>Characteristic | <u><i>DNMT3A</i>mut (n = 6)</u> |     | <u><i>DNMT3A</i>wt (n = 12)</u> |     |
|-------------------------------------|---------------------------------|-----|---------------------------------|-----|
|                                     | n                               | %   | n                               | %   |
| <b>Age (years)</b>                  |                                 |     |                                 |     |
| <b>Median</b>                       | 61                              |     | 32                              |     |
| <b>range</b>                        | (31-74)                         |     | (20-75)                         |     |
| <b>Gender</b>                       |                                 |     |                                 |     |
| <b>Female</b>                       | 1                               | 16% | 4                               | 33% |
| <b>Male</b>                         | 5                               | 84% | 8                               | 67% |
| <b>MPAL subtype</b>                 |                                 |     |                                 |     |
| <b>T/myeloid</b>                    | 3                               | 50% | 9                               | 75% |
| <b>B/myeloid</b>                    | 2                               | 33% | 3                               | 25% |
| <b>B-ALL/T-ALL</b>                  | 1                               | 16% | ---                             | --- |
| <b>Cytogenetics</b>                 |                                 |     |                                 |     |
| <b>Normal</b>                       | 2                               | 33% | 1                               | 8%  |
| <b>Abnormal chr 5 or 7</b>          | 1                               | 16% | 5                               | 42% |
| <b>Other</b>                        | 3                               | 50% | 6                               | 50% |
